# Supplementary material for: Hydrolysis of a carbamate triggered by coordination of metal ions
Source: Royal Society of Chemistry journal article supplement (doi:10.1039/d2dt01622b), 2022-01-01
Supplement: d2dt01622b1.pdf [file d2dt01622b1.pdf]

## Supporting Information

### Hydrolysis of a carbamate triggered by coordination of metal ions

Sandra Fernández-Fariña,<sup>a</sup> Miguel Martínez-Calvo,<sup>a</sup> María J. Romero,<sup>a</sup> José M. Seco,<sup>b</sup> Guillermo Zaragoza,<sup>c</sup> Rosa Pedrido<sup>a\*</sup> and Ana M. González-Noya<sup>a\*</sup>

---

<sup>a</sup> *Departamento de Química Inorgánica, Facultade de Química, Campus Vida, Universidade de Santiago de Compostela, 15782 Santiago de Compostela, Spain  
E-mail: ana.gonzalez.noya@usc.es, rosa.pedrido@usc.es*

<sup>b</sup> *Departamento de Química Orgánica, Facultade de Química, Campus Vida, Universidade de Santiago de Compostela, Santiago de Compostela, Galicia, E-15782, Spain*

<sup>c</sup> *Unidade de Difracción de Raios X, Edificio CACTUS, Universidade de Santiago de Compostela, Campus Vida, Santiago de Compostela, 15782, Spain*

## Table of contents

|                                                                                                                                                                           |           |
|---------------------------------------------------------------------------------------------------------------------------------------------------------------------------|-----------|
| <b>1. Crystallographic data of complexes [CuL'(Cl)<sub>2</sub>] 0.5H<sub>2</sub>O <b>2</b>* and [CdL'(Cl)<sub>2</sub>] <b>4</b>*</b> .....                                | <b>S2</b> |
| Table S1. Main bond distances (Å) and angles (°) in [CuL'(Cl) <sub>2</sub> ] 0.5H <sub>2</sub> O <b>2</b> *. ....                                                         | S4        |
| Table S2. Main bond distances (Å) and angles (°) in [CdL'(Cl) <sub>2</sub> ] <b>4</b> *. ....                                                                             | S4        |
| Table S3. Hydrogen bonds distances (Å) in [CuL'(Cl) <sub>2</sub> ] 0.5H <sub>2</sub> O <b>2</b> *. ....                                                                   | S5        |
| Table S4. Hydrogen bonds distances (Å) in [CdL'(Cl) <sub>2</sub> ] <b>4</b> *. ....                                                                                       | S5        |
| <b>2. Additional Figures</b> .....                                                                                                                                        | <b>S5</b> |
| Figure S1. ESI-MS spectrum of organic side-product in the mother liquors of CuL'(Cl) <sub>2</sub> ·H <sub>2</sub> O <b>2</b> . ..                                         | S6        |
| Figure S2. ESI-MS spectrum of organic side-product in the mother liquors of ZnL'(Cl) <sub>2</sub> <b>3</b> . ....                                                         | S6        |
| Figure S3. Superposition of <sup>1</sup> H NMR spectra of ZnL'(Cl) <sub>2</sub> <b>3</b> (above) and CdL'(Cl) <sub>2</sub> <b>4</b> (below) in DMSO-d <sub>6</sub> . .... | S7        |
| Figure S4. IR spectrum in KBr of the complex NiL'(Cl) <sub>2</sub> ·H <sub>2</sub> O <b>1</b> . ....                                                                      | S7        |
| Figure S5. ESI-MS spectrum of the complex NiL'(Cl) <sub>2</sub> ·H <sub>2</sub> O <b>1</b> . ....                                                                         | S8        |
| Figure S6. ESI-MS spectrum of the complex CdL'(Cl) <sub>2</sub> <b>4</b> . ....                                                                                           | S8        |
| Figure S7. Zigzag arrangement of the molecules of the complex CdL'(Cl) <sub>2</sub> <b>4</b> * forming a 2D network trough hydrogen bonding. ....                         | S9        |
| Figure S8. 3D network of the CuL'(Cl) <sub>2</sub> 0.5H <sub>2</sub> O <b>2</b> * formed by hydrogen bonding interactions between pairs of "dimers". ....                 | S9        |
| <b>3. References</b> .....                                                                                                                                                | <b>S9</b> |

## 1. Crystallographic data of complexes [CuL'(Cl)<sub>2</sub>] 0.5H<sub>2</sub>O 2\* and [CdL'(Cl)<sub>2</sub>] 4\*

Coloured crystals of [CuL'(Cl)<sub>2</sub>] 0.5H<sub>2</sub>O 2\* and [CdL'(Cl)<sub>2</sub>] 4\* were obtained as indicated before. The crystals were mounted on a glass fibre and directly used for data collection. Crystal data collection was performed at a 100(2) K temperature using a BRUKER APPEX-II diffractometer with a CCD area detector, using graphite monochromated MoK(α) radiation ( $\lambda = 0.71073 \text{ \AA}$ ). Data were treated with APPEX2 software.<sup>1</sup> An empirical absorption correction (SADABS)<sup>2</sup> was applied to the collected reflections. The structure of [CuL'(Cl)<sub>2</sub>] 0.5H<sub>2</sub>O was solved by using the SIR-97 program<sup>3</sup> and refined by full-matrix least-squares techniques against  $F^2$  using SHELXL-97 program package.<sup>4</sup> [CdL'(Cl)<sub>2</sub>] was solved with DIRDIF96 program<sup>5</sup> and refined by full-matrix least-squares techniques against  $F^2$  using SHELXL-97 program package.<sup>3</sup> All non-hydrogen atoms were assigned with positional and anisotropic displacement parameters. The hydrogen atoms were placed in calculated positions, riding on attached atoms with isotropic thermal parameters (1.2-1.5 times those of their carrier atoms). Criteria of a satisfactory complete analysis were the ratios of "rms" shift to standard deviation less than 0.001 was taken and no significant features were observed in the final difference maps. The molecular graphics include in the manuscript were prepared with MERCURY<sup>6</sup> program. The most relevant crystal data of both crystals are listed below. Important bond distances and angles are summarized in Tables S1 and S2 while hydrogen bond parameters are listed in Tables S3 and S4.

**[CuL'(Cl)<sub>2</sub>] 0.5H<sub>2</sub>O 2\*:** Formula: 2(C<sub>9</sub>H<sub>13</sub>Cl<sub>2</sub>CuN<sub>5</sub>)·H<sub>2</sub>O; Volume: 2554.1(4) Å<sup>3</sup>, MW: 669.38 g·mol<sup>-1</sup>; Crystal size: 0.32 x 0.17 x 0.03 mm<sup>3</sup>; Z= 4; Spatial Group:  $P2_1/n$ ; D: 1.741 mg m<sup>-3</sup>; Crystal System: Monoclinic; Interval  $\theta$ : 2.5–23.2 °; a= 16.3718(13) Å; b= 8.9832(7) Å, c= 17.4044(14) Å;  $\alpha = 90^\circ$ ;  $\beta = 93.781(4)^\circ$ ;  $\gamma = 90^\circ$ ;  $\mu = 2.12 \text{ mm}^{-1}$ ; F(000)= 1360; Radiation  $\lambda(\text{Mo-K}\alpha) = 0.7107 \text{ \AA}$ , Measured/unique reflexions: 334364/4637 (Rint= 0.081); R= 0.042; wR= 0.103; GOF= 1.039; Residues: 1.19/-0.69 e Å<sup>-3</sup>. CCDC: 2174268.

**[CdL'(Cl)<sub>2</sub>] 4\*:** Formula: C<sub>9</sub>H<sub>13</sub>CdCl<sub>2</sub>N<sub>5</sub>; Volume: 1286.5(5) Å<sup>3</sup>, MW: 374.54 g·mol<sup>-1</sup>; Crystal size: 0.55 x 0.31 x 0.19 mm<sup>3</sup>; Z= 4; Spatial Group:  $P2_1/n$ ; D: 1.934 mg m<sup>-3</sup>; Crystal System: Monoclinic; Interval  $\theta$ : 2.4-28°; a= 8.366(2) Å; b= 14.446(3) Å, c= 10.650(2) Å;  $\alpha = 90^\circ$ ;  $\beta = 91.774(4)^\circ$ ;  $\gamma = 90^\circ$ ;  $\mu = 2.10 \text{ mm}^{-1}$ ; F(000)= 736; Radiation  $\lambda(\text{Mo-K}\alpha) = 0.7107 \text{ \AA}$ , Measured/unique reflexions: 22962/3042 (Rint= 0.032); R= 0.021; wR= 0.054; GOF= 1.093; Residues: 0.36/-0.41 e Å<sup>-3</sup>. CCDC: 2174283.

| Bond Distances (Å) |            |                      |            |
|--------------------|------------|----------------------|------------|
| Cu(1)-N(1)         | 1.935(3)   | Cu(1B)-N(1B)         | 1.920(4)   |
| Cu(1)-N(62)        | 2.038(4)   | Cu(1B)-N(62B)        | 2.047(4)   |
| Cu(1)-N(22)        | 2.043(4)   | Cu(1B)-N(22B)        | 2.044(4)   |
| Cu(1)-Cl(2)        | 2.2394(12) | Cu(1B)-Cl(2B)        | 2.2238(12) |
| Cu(1)-Cl(3)        | 2.4925(12) | Cu(1B)-Cl(3B)        | 2.5394(12) |
| Bond Angles (°)    |            |                      |            |
| N(1)-Cu(1)-N(62)   | 78.35(14)  | N(1B)-Cu(1B)-N(62B)  | 78.44(15)  |
| N(1)-Cu(1)-N(22)   | 78.31(15)  | N(1B)-Cu(1B)-N(22B)  | 79.25(15)  |
| N(62)-Zn(1)-N(22)  | 154.41(14) | N(62B)-Cu(1B)-N(22B) | 155.24(15) |
| N(1)-Cu(1)-Cl(2)   | 158.36(11) | N(1B)-Cu(1B)-Cl(2B)  | 165.62(11) |
| N(62)-Cu(1)-Cl(2)  | 97.00(10)  | N(62B)-Cu(1B)-Cl(2B) | 99.11(11)  |
| N(22)-Cu(1)-Cl(2)  | 100.83(11) | N(22B)-Cu(1B)-Cl(2B) | 99.84(11)  |
| N(1)-Cu(1)-Cl(3)   | 99.84(11)  | N(1B)-Cu(1B)-Cl(3B)  | 94.44(11)  |
| N(62)-Cu(1)-Cl(3)  | 99.85(10)  | N(62B)-Cu(1B)-Cl(3B) | 101.00(11) |
| N(22)-Cu(1)-Cl(3)  | 94.34(11)  | N(22B)-Cu(1B)-Cl(3B) | 91.27(11)  |
| Cl(2)-Cu(1)-Cl(3)  | 101.78(4)  | Cl(2B)-Cu(1B)-Cl(3B) | 99.94(4)   |

**Table S1.** Main bond distances (Å) and angles (°) in [CuL'(Cl)<sub>2</sub>] 0.5H<sub>2</sub>O 2\*.

| Bond Distances (Å) |           |                   |            |
|--------------------|-----------|-------------------|------------|
| Cd(1)-N(1)         |           |                   | 2.2926(17) |
| Cd(1)-N(62)        |           |                   | 2.3437(19) |
| Cd(1)-N(22)        |           |                   | 2.4072(18) |
| Cd(1)-Cl(2)        |           |                   | 2.4264(7)  |
| Cd(1)-Cl(3)        |           |                   | 2.4701(7)  |
| Bond Angles (°)    |           |                   |            |
| N(1)-Cd(1)-N(62)   | 69.32(6)  | N(22)-Cd(1)-Cl(2) | 96.44(5)   |
| N(1)-Cd(1)-N(22)   | 67.59(6)  | N(1)-Cd(1)-Cl(3)  | 105.25(5)  |
| N(62)-Cd(1)-N(22)  | 133.70(7) | N(62)-Cd(1)-Cl(3) | 98.58(5)   |
| N(1)-Cd(1)-Cl(2)   | 148.78(4) | N(22)-Cd(1)-Cl(3) | 108.23(5)  |
| N(62)-Cd(1)-Cl(2)  | 112.27(5) | Cl(2)-Cd(1)-Cl(3) | 105.23(3)  |

**Table S2.** Main bond distances (Å) and angles (°) in [CdL'(Cl)<sub>2</sub>] 4\*.

| D-H...A                        | D...A (Å) | D-H...A (°) | Symmetry Operation      |
|--------------------------------|-----------|-------------|-------------------------|
| N23—H23B...N63B <sup>i</sup>   | 3.156(6)  | 139(5)      | $x, y+1, z$             |
| N23—H23A...Cl3 <sup>i</sup>    | 3.248(4)  | 140(5)      | $x, y+1, z$             |
| N63—H63B...Cl3 <sup>ii</sup>   | 3.180(4)  | 119(4)      | $-x+1/2, y-1/2, -z+1/2$ |
| N63—H63A...Cl2                 | 3.297(4)  | 129(4)      |                         |
| N63—H63B...Cl2 <sup>ii</sup>   | 3.460(4)  | 141(4)      | $-x+1/2, y-1/2, -z+1/2$ |
| N23B—H23D...Cl2B               | 3.317(5)  | 133(4)      |                         |
| N23B—H23C...Cl3 <sup>iii</sup> | 3.271(4)  | 150(4)      | $-x+3/2, y+1/2, -z+1/2$ |
| N63B—H63C...Cl2B               | 3.337(5)  | 134(4)      |                         |
| N63B—H63D...N63 <sup>ii</sup>  | 3.069(6)  | 148(5)      | $-x+1/2, y-1/2, -z+1/2$ |
| O1—H1O...Cl3 <sup>iv</sup>     | 3.489(4)  | 170(5)      | $X+1/2, -y+3/2, z+1/2$  |
| O1—H2O...Cl3B <sup>i</sup>     | 3.214(4)  | 163(6)      | $x, y+1, z$             |

**Table S3.** Hydrogen bonds distances (Å) in [CuL'(Cl)<sub>2</sub>] 0.5H<sub>2</sub>O **2\***.

| D-H...A                       | D...A (Å) | D-H...A (°) | Symmetry Operation     |
|-------------------------------|-----------|-------------|------------------------|
| N23-H23A...Cl2 <sup>i</sup>   | 3.487(2)  | 139(3)      | $x+1/2, -y+1/2, z+1/2$ |
| N23-H23B...Cl3 <sup>ii</sup>  | 3.417(3)  | 141(2)      | $x-1/2, -y+1/2, z+1/2$ |
| N63-H63B...Cl3 <sup>iii</sup> | 3.250(2)  | 149(3)      | $x-1/2, -y+1/2, z-1/2$ |
| N63-H63A...N23 <sup>iii</sup> | 3.034(3)  | 162(3)      | $x-1/2, -y+1/2, z-1/2$ |

**Table S4.** Hydrogen bonds distances (Å) in [CdL'(Cl)<sub>2</sub>] **4\***.

## 2. Additional Figures

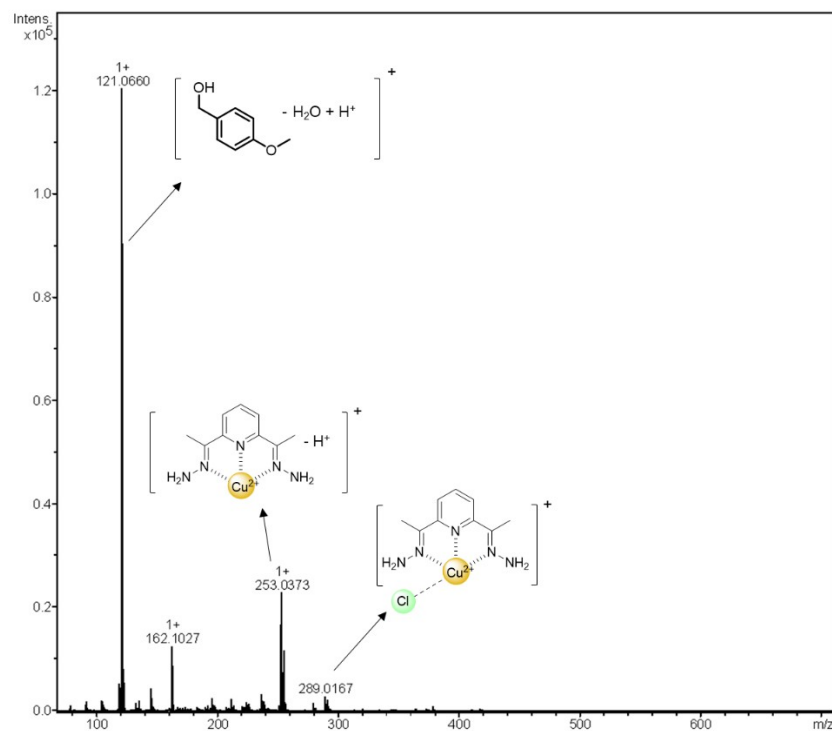

**Figure S1.** ESI-MS spectrum of organic side-product in the mother liquors of  $\text{CuL}'(\text{Cl})_2 \cdot \text{H}_2\text{O}$  **2**.

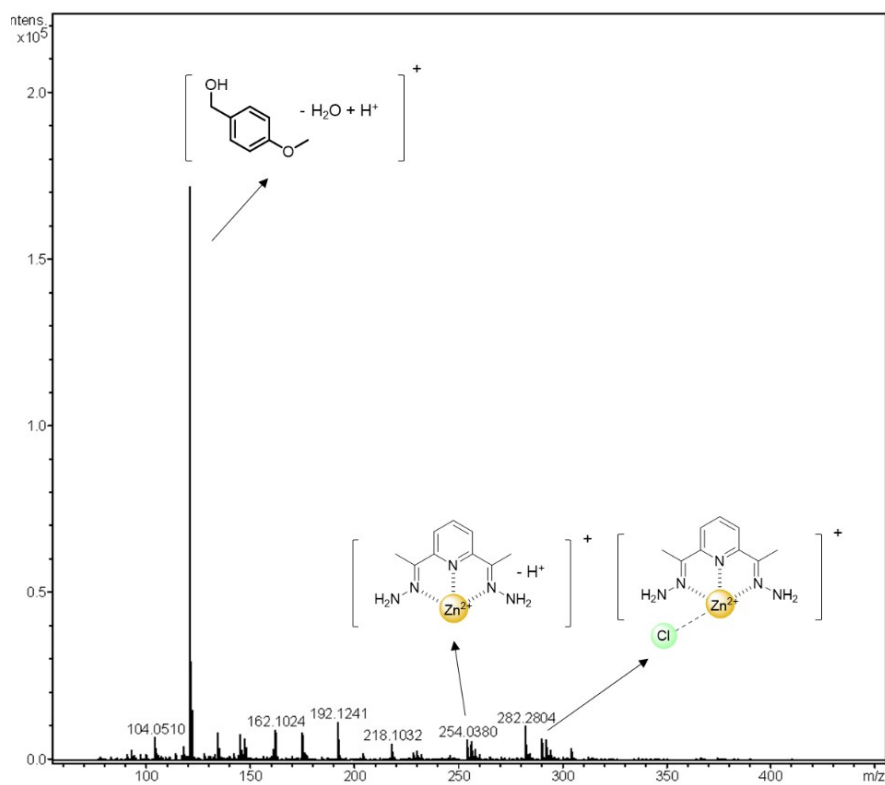

**Figure S2.** ESI-MS spectrum of organic side-product in the mother liquors of  $\text{ZnL}'(\text{Cl})_2$  **3**.

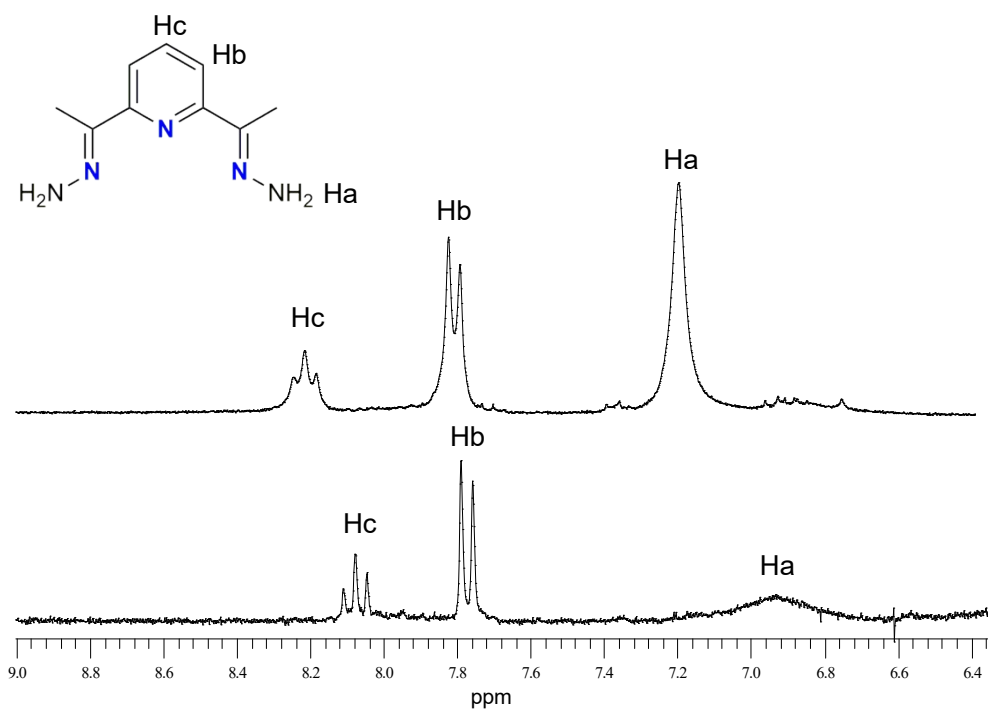

**Figure S3.** Superposition of  $^1\text{H}$  NMR spectra of  $\text{ZnL}'(\text{Cl})_2$  **3** (above) and  $\text{CdL}'(\text{Cl})_2$  **4** (below) in  $\text{DMSO-d}_6$ .

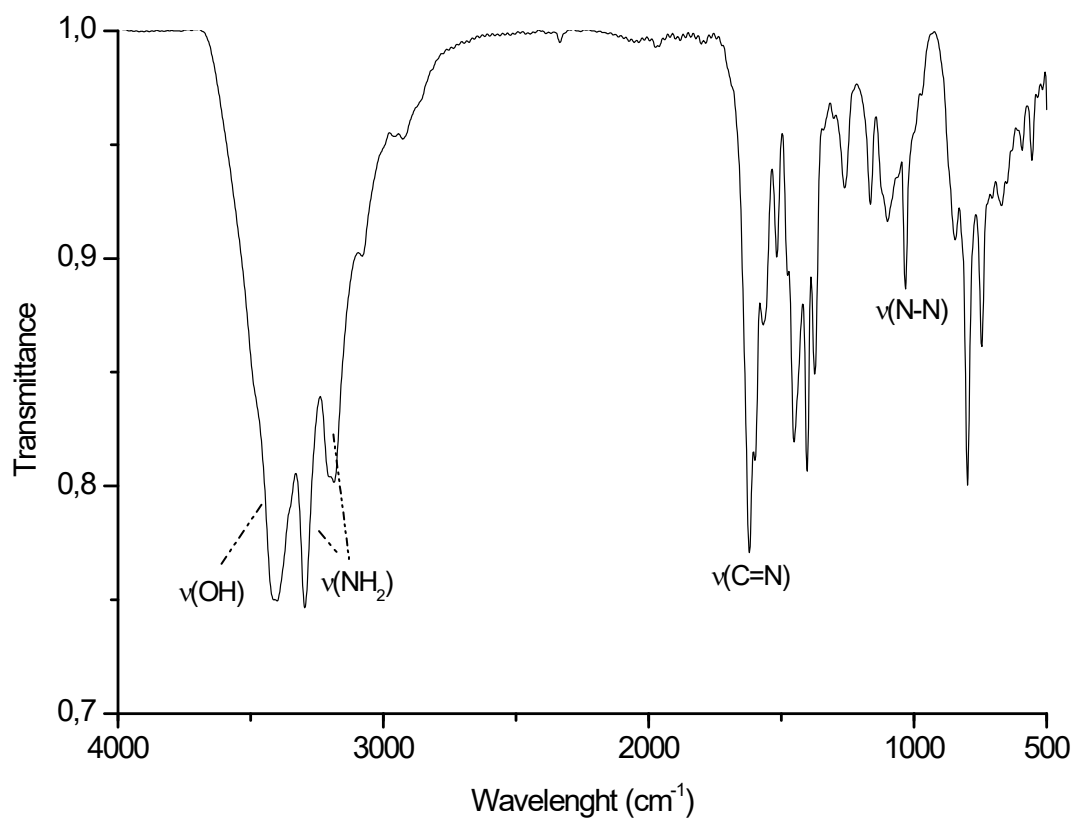

**Figure S4.** IR spectrum in KBr of the complex  $\text{NiL}'(\text{Cl})_2 \cdot \text{H}_2\text{O}$  **1**.

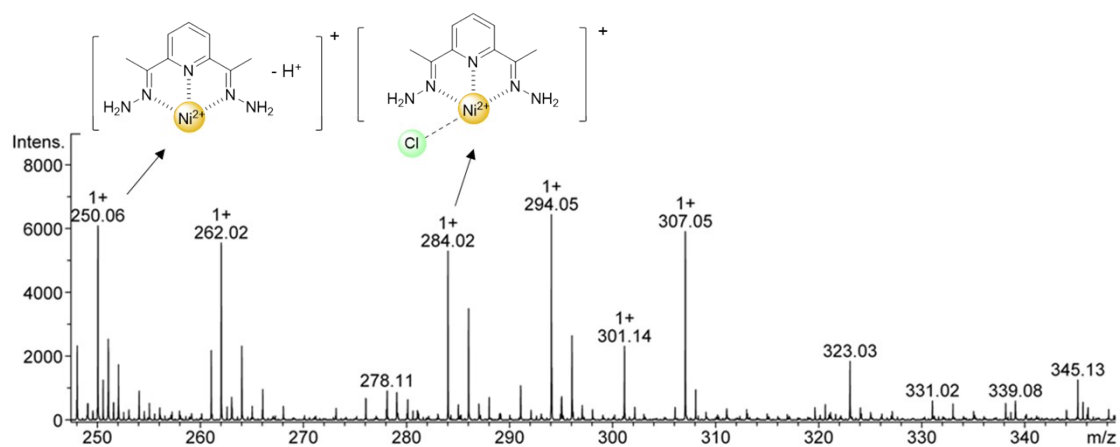

Figure S5. ESI-MS spectrum of the complex  $\text{NiL}'(\text{Cl})_2 \cdot \text{H}_2\text{O}$  **1**.

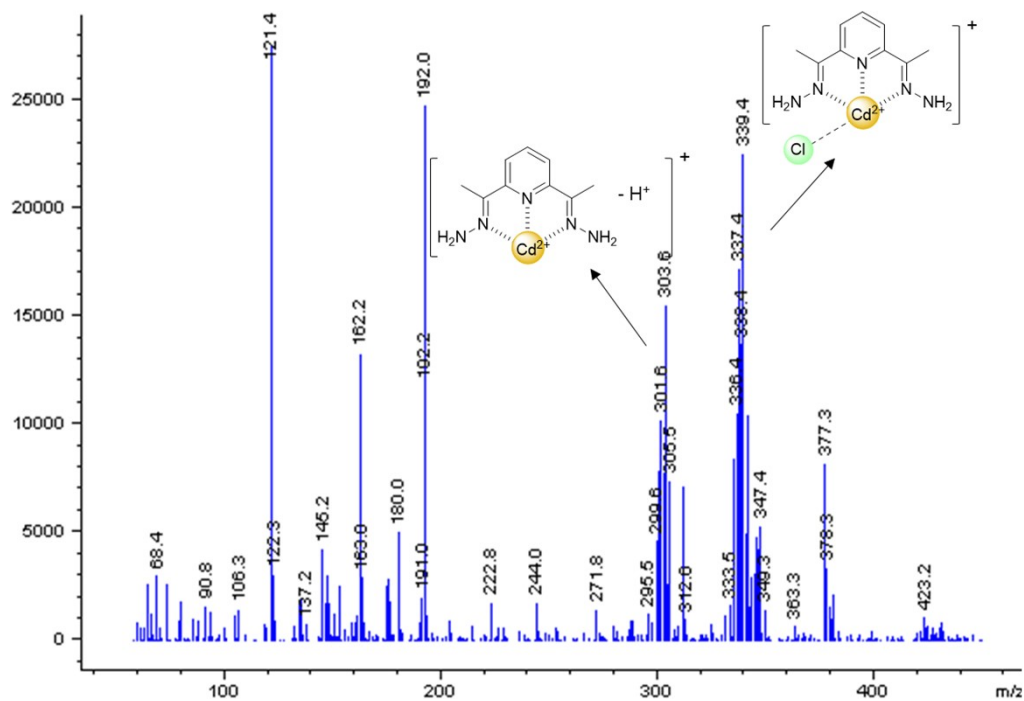

Figure S6. ESI-MS spectrum of the complex  $\text{CdL}'(\text{Cl})_2$  **4**.



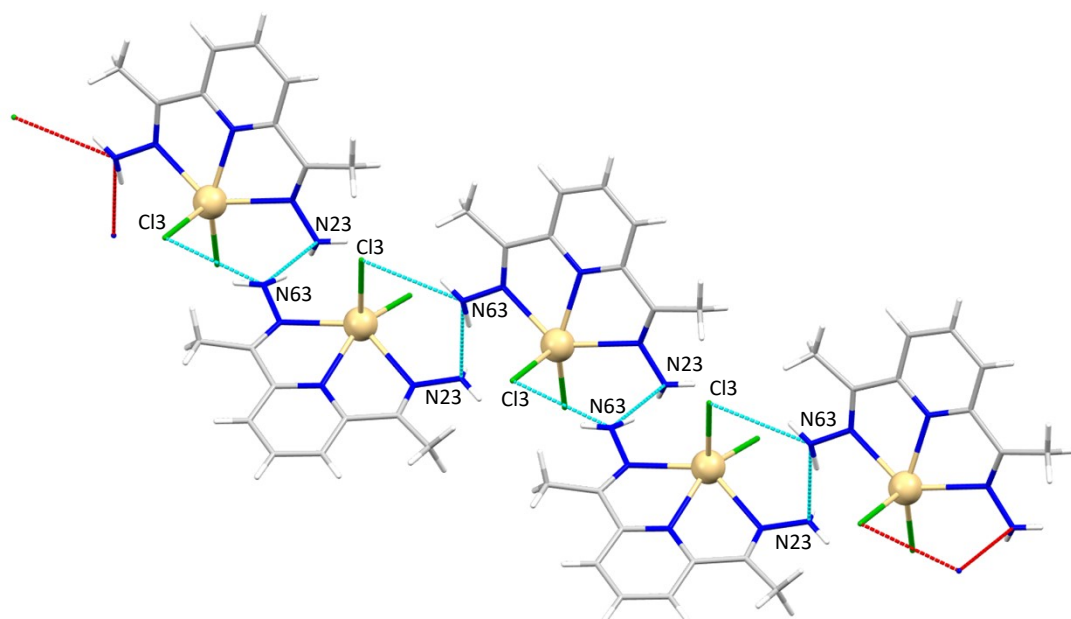

**Figure S7.** Zigzag arrangement of the molecules of the complex  $\text{CdL}'(\text{Cl})_2 \mathbf{4}^*$  forming a 2D network through hydrogen bonding.

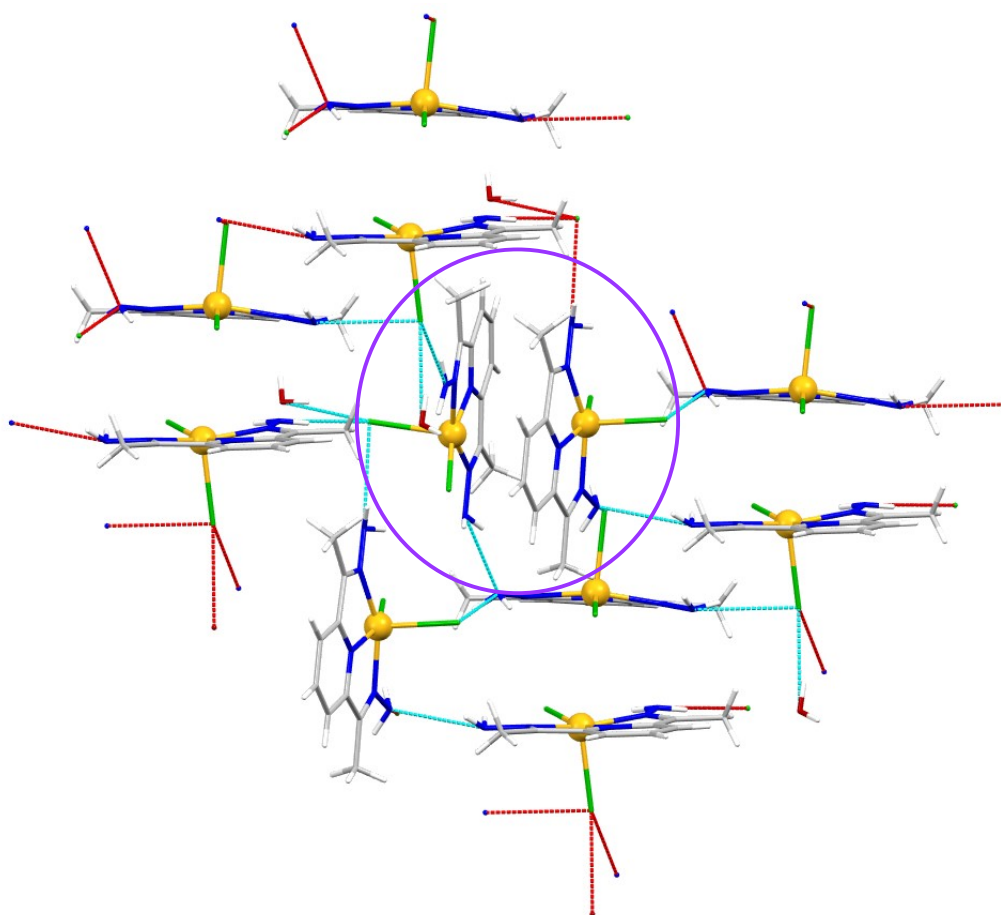

**Figure S8.** 3D network of the  $\text{CuL}'(\text{Cl})_2 \cdot 0.5\text{H}_2\text{O} \mathbf{2}^*$  formed by hydrogen bonding interactions between pairs of "dimers".

### 3. References

- 1 BRUKER, AXS. D8 ADVANCE, 2005.
- 2 G. M. Sheldrick, *Program for Scaling and Correction of Area Detector Data*, University., 1996.
- 3 A. Altomare, M. C. Burla, M. Camalli, G. L. Cascarano, C. Giacovazzo, A. Guagliardi, A. G. G. Moliterni, G. Polidori and R. Spagna, *J. Appl. Crystallogr.*, 1999, **32**, 115–119.
- 4 G. M. Sheldrick, *Acta Crystallogr. Sect. A Found. Crystallogr.*, 2008, **64**, 112–122.
- 5 P. T. . Beurskens, G. . Admiraal, G. . Beurskens, W. P. . Bosman, R. . de Gelder, R. . Israel and J. M. M. Smits, *The DIRDIF-99 program system, Technical Report of the Crystallography Laboratory*, University., 1999.
- 6 C. F. Macrae, I. J. Bruno, J. A. Chisholm, P. R. Edgington, P. McCabe, E. Pidcock, L. Rodriguez-monge, R. Taylor, J. Van De Streek and P. A. Wood, *J. Appl. Crystallogr.*, 2008, 466–470.
